Differential relationships between habitat fragmentation and within-population genetic diversity  
of three forest-dwelling birds

Abridged title: Habitat fragmentation and population genetic variation

Benjamin Zuckerberg<sup>1,2</sup>, Matthew D. Carling<sup>2,3</sup>, Roi Dor<sup>2,4</sup>, Elise D. Ferree<sup>2,5</sup>, Garth M. Spellman<sup>6</sup>, and Andrea K. Townsend<sup>2,7</sup>

8

<sup>1</sup>Department of Forest and Wildlife Ecology, University of Wisconsin, 226 Russell Labs,  
Madison, WI 53706, USA, [bzuckerberg@wisc.edu](mailto:bzuckerberg@wisc.edu)

<sup>2</sup>Cornell Lab of Ornithology, Cornell University, Ithaca, NY 14850, USA

<sup>3</sup>Department of Zoology and Physiology, Berry Biodiversity Conservation Center, University of  
Wyoming, Laramie, WY, 82071, USA, [mcarling@uwyo.edu](mailto:mcarling@uwyo.edu)

<sup>4</sup>Department of Zoology, Tel Aviv University, Tel Aviv 69978, Israel, [roidor@post.tau.ac.il](mailto:roidor@post.tau.ac.il)

<sup>5</sup>Keck Science Department, Claremont Colleges, Claremont, CA, 91711 USA,  
[EFerree@kecksci.claremont.edu](mailto:EFerree@kecksci.claremont.edu)

<sup>6</sup>Department of Biology, Black Hills State University, Spearfish, SD 57799, USA,  
[Garth.Spellman@bhsu.edu](mailto:Garth.Spellman@bhsu.edu)

<sup>7</sup>Department of Wildlife, Fish, and Conservation Biology, University of California, Davis  
One Shields Avenue, Davis, CA 95616, USA, [aktownsend@ucdavis.edu](mailto:aktownsend@ucdavis.edu)

22

*Abstract* Habitat fragmentation is a major driver of environmental change affecting  
24 wildlife populations across multiple levels of biological diversity. Much of the recent research in  
landscape genetics has focused on quantifying the influence of fragmentation on genetic  
26 variation among populations, but questions remain as to how habitat loss and configuration  
influences within-population genetic diversity. Habitat loss and fragmentation might lead to  
28 decreases in genetic diversity within populations, which might have implications for population  
persistence over multiple generations. We used genetic data collected from populations of three  
30 species occupying forested landscapes across a broad geographic region: Mountain Chickadee  
(*Poecile gambeli*; 22 populations), White-breasted Nuthatch (*Sitta carolinensis*; 13 populations)  
32 and Pygmy Nuthatch (*Sitta pygmaea*; 19 populations) to quantify patterns of haplotype and  
nucleotide diversity across a range of forest fragmentation. We predicted that fragmentation  
34 effects on genetic diversity would vary depending on dispersal capabilities and habitat specificity  
of the species. Forest aggregation and the variability in forest patch area were the two strongest  
36 landscape predictors of genetic diversity. We found higher haplotype diversity in populations of  
*P. gambeli* and *S. carolinensis* inhabiting landscapes characterized by lower levels of forest  
38 fragmentation. Conversely, *S. pygmaea* demonstrated the opposite pattern of higher genetic  
diversity in fragmented landscapes. For two of the three species, we found support for the  
40 prediction that highly fragmented landscapes sustain genetically less diverse populations. We  
suggest, however, that future studies should focus on species of varying life-history traits  
42 inhabiting independent landscapes to better understand how habitat fragmentation influences  
within-population genetic diversity.

44 *Key words:* *haplotype diversity, mitochondrial DNA, nucleotide diversity, Poecile*  
*gambeli, Sitta carolinensis, Sitta pygmaea*

46 INTRODUCTION

Ecologists often study how habitat composition and configuration influences the abundance and  
48 occurrence of organisms (Turner et al. 2001, Fahrig 2003), but in recent years, the field of  
landscape genetics has focused on how these landscape features influence genetic variation  
50 (Anderson et al. 2010, Sork and Waits 2010, Storfer et al. 2010). Landscape genetics studies  
have successfully incorporated the role of isolation and geographic distance in explaining genetic  
52 variation among populations (e.g., Jenkins et al. 2010); however, there has been a persistent  
interest in examining how habitat composition and configuration influences genetic diversity  
54 within populations (Bruggeman et al. 2010, Sork and Waits 2010, Thomassen et al. 2010). This  
interest has been driven, in part, by the concern that habitat fragmentation might lead to  
56 decreases in genetic diversity within animal populations, which might have strong implications  
for the persistence of populations over multiple generations (Frankham et al. 2010).

58 The process of habitat loss and fragmentation produces landscapes characterized by  
isolated habitat patches of decreasing size and continuity and has important implications on  
60 genetic diversity. Landscapes characterized by habitat loss and fragmentation are thought to  
support smaller effective population sizes (Wilcove 1985, Debinski and Holt 2000, Chalfoun et  
62 al. 2002), which neutral theory predicts will lead to decreased genetic diversity (Hartl and Clark  
2007). Empirical evidence seems to support this prediction as birds with relatively larger  
64 populations and broader distributions are genetically more diverse (Moller et al. 2008). For many  
species, one of the mechanisms driving this pattern is that fragmentation causes decreased rates  
66 of individual movement and dispersal among isolated habitat patches (Belisle et al. 2001),  
leading to a subdivided and more variable population (Boulinier et al. 1998, Boulinier et al.  
68 2001, Donovan and Flather 2002). In turn, random genetic drift and reduced gene flow leads to

an eventual decline of within-population genetic diversity as a result of declining and/or  
70 disconnected populations (Templeton et al. 1990, Young et al. 1996, Keyghobadi 2007).

Comparative studies on the genetic impact of habitat fragmentation among populations  
72 generally support the prediction of reduced genetic diversity in fragmented landscapes  
(Keyghobadi 2007). Many of these studies, however, are plagued by analytical and  
74 methodological limitations. First, studies of habitat fragmentation often confound habitat loss  
with the process of habitat fragmentation per se (the spatial breaking apart of habitat independent  
76 of habitat loss) (Fahrig 2003). A potential reason for this limitation results from a lack of  
replication of independent landscapes by which to assess variability in habitat configuration  
78 (McGarigal and Cushman 2002). Second, most comparative studies compare genetic structure  
within a control and fragmented landscape in the same geographic region. As a result, it is  
80 difficult to identify which aspects of fragmentation might be driving changes in genetic  
responses and differentiate those from broader-scaled regional patterns (Johansson et al.  
82 2005). Third, few studies focus on multiple species with varying life history characteristics. It is  
likely that species of different characteristics of dispersal and habitat specificity could mediate  
84 the genetic response to fragmentation at a landscape scale (Van Houtan et al. 2007, Bowie 2011,  
Callens et al. 2011). Genetic diversity is a population characteristic that should be particularly  
86 sensitive to the spatial distribution of habitat, and there is a need to evaluate the characteristics of  
habitat loss and fragmentation that could lead to genetic variation among multiple species  
88 inhabiting a continuum of fragmentation.

We quantified patterns of within-population genetic diversity for bird populations  
90 exposed to a range of habitat fragmentation for three species of passerine birds found throughout  
the western United States: Mountain Chickadee (*Poecile gambeli*), White-breasted Nuthatch

92 (*Sitta carolinensis*) and Pygmy Nuthatch (*Sitta pygmaea*). Previous molecular analyses have  
suggested that some of the range-wide patterns of genetic structure and among-population  
94 diversity in these three species can be explained by historical isolation and subsequent expansion  
from glacial refugia in the Pleistocene. In *P. gambeli*, two clades are consistent with isolation in  
96 two refugia during glacial advances (Spellman et al. 2007), and among western populations of *S.*  
*carolinensis*, two of three clades decrease in nucleotide diversity with increasing latitude, a  
98 pattern consistent with expansion from southern glacial refugia (Spellman and Klicka 2007). For  
*S. pygmaea*, expansion from a single glacial refugium in southern coastal California may have  
100 led to a positive correlation of nucleotide diversity with longitude (Spellman and Klicka 2006).  
However, these studies primarily focused on phylogeographic patterns of genetic diversity  
102 among populations as opposed to genetic characteristics within independent populations.

Our objective was to use existing genetic data to test the relationship between habitat  
104 fragmentation and within-population genetic diversity for the above three forest-breeding bird  
species across a range of fragmentation. We predicted that the relationship between  
106 fragmentation and within-population genetic diversity, as measured by haplotype and nucleotide  
diversity, would vary among species according to their dispersal capabilities and habitat  
108 requirements. Specifically, we predicted that the genetic diversity of the *P. gambeli*, with its  
intermediate dispersal distance (McCallum et al. 1999) and habitat specificity might not vary  
110 with fragmentation. We predicted that genetic diversity would be higher for the *S. carolinensis* in  
fragmented landscapes, because of their longer dispersal distances (Grubb and Pravosudov 2008)  
112 and relatively diverse habitat associations. Finally, we predicted that genetic diversity would  
decrease in fragmented landscapes for the *S. pygmaea*, with its relatively poor dispersal  
114 capabilities (Kingery and Ghalambor 2001) and strict habitat associations, because it would be

less likely to disperse across a fragmented landscape (Van Houtan et al. 2007). Generalist species  
116 that exhibit relatively greater rates of dispersal should be less susceptible to the impacts of  
habitat fragmentation and its associated processes that erode local genetic diversity over time  
118 (Mech and Hallet 2001, Vandergast et al. 2007, Bowie 2011).

## 120 METHODS

### *Study species and genetic sampling*

122 The distribution of each of our study species, *P. gambeli*, *S. carolinensis*, and *S. pygmaea*,  
matches the distribution of their preferred forest habitats, coniferous forests, pine-oak and long-  
124 needle pine, respectively. *Poecile gambeli* generally prefers montane coniferous forests and areas  
dominated by pine, spruce-fir (*Picea-Abies*), and piñon-juniper (*Pinus-Juniperus*) (McCallum et  
126 al. 1999). They will occur in mixed coniferous-deciduous habitats, but show preferential use of  
conifer stands in these settings (McCallum et al. 1999). *Poecile gambeli* generally does not  
128 migrate, but most yearlings exhibit natal dispersal, although young dispersers sometimes move  
only as far as adjacent family groups (McCallum et al. 1999). *Sitta carolinensis* is more closely  
130 associated with mature deciduous woodland, but can also breed in mixed deciduous, coniferous  
forest, and a variety of montane woodland habitats (Grubb and Pravosudov 2008). They exhibit  
132 somewhat irruptive migration and disperse up to 10 km in their first year, and although little is  
known about natal dispersal distances for *S. carolinensis* (Grubb and Pravosudov 2008), mean  
134 natal dispersal distances were less than 10 km in both a Belgian population (Matthysen and  
Schmidt 1987) and German population (Winkel 1989) of Eurasian nuthatches (*Sitta europaea*).  
136 Finally, *S. pygmaea* is the most specific in terms of habitat requirements. *Sitta pygmaea*  
demonstrates a strong and almost exclusive preference for long-needled pine forests and are co-

138 extensive with that of ponderosa pine (*Pinus ponderosa*), Jeffrey pine (*Pinus jeffreyi*), and  
similar species (Kingery and Ghalambor 2001). They are also the most sedentary of the three  
140 study species, with no migration and very short natal dispersal distances (< 500 m; Kingery and  
Ghalambor 2001). Recorded mean natal dispersal distance for *S. pygmaea* centers around 287 m  
142 (range = 0-533 m; Norris 1958). Evidence from individual populations also suggests that each  
species is most likely to occur in relatively intact forested areas when compared to fragmented  
144 landscapes (Brawn and Balda 1988, McCallum et al. 1999, Villard et al. 1999). Because of their  
wide distribution across western North America and reliance on forest habitats, these species  
146 created a suitable system to examine the influence of habitat fragmentation on within-population  
genetic diversity.

148 For each species, we used available sequences of the mitochondrial gene NADH  
dehydrogenase subunit 2 (ND2; 1041 bp) from previously published phylogeographic studies on  
150 the three species (Spellman and Klicka 2006, 2007, Spellman et al. 2007). We used previously  
generated ND2 sequences from 216 *P. gambeli* individuals (22 populations), 92 *S. carolinensis*  
152 individuals (13 populations) and 132 *S. pygmaea* individuals (19 populations; Fig. 1; Table 1).  
The location of sampling sites emphasized protected areas with limited anthropogenic  
154 disturbance (e.g., National Forests, State Parks, and State Game Preserves).

### 156 *Genetic data analysis*

Using ARLEQUIN v3.11, we estimated two indices of within-population genetic diversity:  
158 haplotype diversity and pairwise nucleotide diversity (Excoffier et al. 2005). Haplotype diversity  
is the probability that two randomly chosen haplotypes are different in the sample, whereas  
160 nucleotide diversity is the average pairwise nucleotide difference between two sequences in each

population. Nucleotide diversity is haplotype diversity at the nucleotide level; therefore, it  
162 captures not only how many different haplotypes are in a population, but also how different those  
haplotypes are from each other. Low haplotype and nucleotide diversity can indicate low  
164 underlying effective population size (Avice 2000), the influence of recent expansions from  
glacial refugia (Spellman and Klicka 2006) or cyclical range shifts (Jaarola et al. 1999). These  
166 two indices capture different aspects of genetic variation, but they may be statistically correlated.  
We performed separate analyses for each of the species including sequences from all available  
168 individuals from each population (Table 1).

### 170 *Landscape analysis*

We defined landscapes as a 10 km buffer around each sampled population's centroid to represent  
172 the spatial extent encountered by most dispersing individuals within a single generation.  
Although natal dispersal distances have not been fully characterized for our focal species,  
174 available evidence suggests that these maximum dispersal distances are within a 10 km-radius  
landscape (see *Study species and genetic sampling*).

176 We analyzed the 2001 National Land Cover Data (NLCD) to characterize the cover and  
configuration of forest cover in the 10 km-radius landscape. The 2001 NLCD consists of 16 land  
178 cover classes modeled over the conterminous United States at a 30 m cell resolution and a 0.40  
ha minimum mapping unit (Homer et al. 2007). We calculated the proportion of each land cover  
180 type within each landscape, but because the landscapes tended to be dominated by two primary  
cover types (deciduous or coniferous forest and early-successional cover types), we chose to  
182 aggregate the land cover classes to represent a binary habitat cover map of forest (including  
deciduous/mixed forest or evergreen forest types) and non-forest (including early-successional)



184 cover types. Although there are many metrics available for quantifying landscape heterogeneity  
(Cushman et al. 2008), we quantified fragmentation using a subset of metrics that have been  
186 shown to characterize aspects of forest fragmentation important for forest-breeding birds (e.g.,  
forest patch size variability and forest aggregation) (Table 2). The initial set of metrics used to  
188 describe forest fragmentation included the percentage of landscape classified as forest (Forest),  
area-weighted mean forest patch area (AREA\_AM), forest patch area coefficient of variation  
190 (AREA\_CV), mean nearest neighbor distance (ENN), nearest neighbor distance coefficient of  
variation (ENN\_CV), area-weighted mean edge contrast (ECON), similarity index (SIMI), and  
192 clumpiness index (CLUMPY) (McGarigal et al. 2002). Multicollinearity is a common problem  
when using fragmentation metrics as predictors, and for each species we examined scatter plots  
194 to identify the least correlated ( $r < 0.5$ ) set of predictor variables. We included the proportion of  
forest cover at a 100 km radius landscape (FOR) as a measure of regional habitat availability and  
196 to account for processes that might be occurring over broader spatial scales and maximum  
dispersal events (Tittler et al. 2009). We calculated all landscape metrics in FRAGSTATS  
198 (McGarigal et al. 2002).

## 200 *Statistical analysis*

For each species, we used a generalized linear model with a Gaussian error distribution (GLM)  
202 (Faraway 2006) and AIC<sub>c</sub>-based model selection (Burnham and Anderson 2002) to identify the  
most parsimonious model of the relationship between within-population genetic diversity and  
204 forest fragmentation. Forest cover (at the 10 km landscape-scale), and regional forest availability  
(at the 100 km landscape-scale) was included in every model to statistically examine the  
206 variation in forest configuration while controlling for forest composition. All fragmentation

metrics were standardized for analysis. As the number of individuals sampled in a population can  
208 potentially influence genetic measures (Landguth et al. 2010), we ran two-sided Grubb's tests for  
each species to test for the presence of outliers in the number of sampled individuals (Grubbs  
210 1950). A Grubb's test detects one outlier at a time, and the outliers are expunged from the  
dataset and the test is iterated until no outliers are detected. Following the identification and  
212 elimination of outliers, sample size ( $n$ ) was included as a covariate in model selection. For all  
model runs, we included a model that included only forest cover (at both landscape and regional  
214 scales). We calculated the number of model parameters ( $K$ ),  $AIC_c$  values,  $\Delta AIC_c$ , and Akaike  
weights ( $w_i$ ). Models with a  $\Delta AIC_c < 2$  were considered equivalent (Burnham and Anderson  
216 2002). We calculated Nagelkerke  $R^2$  for assessing the explained variation of the global model in  
a likelihood framework (Nagelkerke 1991). We performed model selection using R (Version  
218 2.10.1; R Development Core Team 2009) with the extension package MuMIn (Barton 2010).

## 220 *Spatial analysis*

We checked for spatial autocorrelation to quantify whether patterns in within-population genetic  
222 diversity were associated with broader latitudinal gradients fragmentation (Spellman and Klicka  
2006, 2007, Spellman et al. 2007) after accounting for the variation explained by forest cover  
224 and fragmentation. We calculated spatial correlograms (Moran's  $I$ ) on residuals of the model  
with strongest support through model selection (Model 1 for each species) at different lag  
226 distances (maximum lag distance = 200 km) and tested whether spatial autocorrelation was  
significant through resampling with 10,000 iterations ( $\alpha < 0.05$ ) (Dormann et al. 2007). We  
228 performed all spatial analyses using the R extension package ncd (Dormann et al. 2007).

230 RESULTS

*Genetic diversity within populations*

232 We found within-population genetic diversity to be variable among populations (within-species)  
both for haplotype diversity (*P. gambeli*: mean =  $0.62 \pm 0.26$ ; *S. carolinensis*: mean =  $0.77 \pm$   
234  $0.24$ ; *S. pygmaea*: mean =  $0.67 \pm 0.23$ ) and for pairwise nucleotide diversity (*P. gambeli*: mean =  
 $0.0019 \pm 0.0015$ ; *S. carolinensis*: mean =  $0.0021 \pm 0.0015$ ; *S. pygmaea*: mean =  $0.0021 \pm$   
236  $0.0010$ ). As expected, haplotype diversity was correlated with nucleotide diversity for all three  
species (*P. gambeli*:  $r^2 = 0.41$ ,  $P < 0.001$ ; *S. carolinensis*:  $r^2 = 0.22$ ,  $P = 0.04$ ; *S. pygmaea*:  $r^2 =$   
238  $0.63$ ,  $P < 0.001$ ).

240 *Patterns of forest fragmentation*

We found that the local 10 km landscapes surrounding the sampling locations consisted of two  
242 primary land cover types, forested upland (characterized by natural or semi-natural wood  
vegetation greater than 6 m tall) and shrubland habitats (characterized by natural or semi-natural  
244 wood vegetation with aerial stems less than 6 m tall), and supported the analysis of these sites as  
binary (forest vs. non-forest) landscapes. Shrubland (non-forest habitats) is a classification  
246 representing natural vegetation (non-agricultural) as areas dominated by shrubs less than 5 m tall,  
and is often also associated with grasses, sedges, herbs, and non-vascular vegetation.

248 For *P. gambeli* populations we found forest composition (10 km radius) ranging from  
25% to 95% (mean = 62%) and regional forest composition (100 km) ranging from 0% to 70%  
250 (mean = 21%). We found similar patterns for the landscapes surrounding *S. carolinensis*  
populations, we found that forest composition ranged from 23% to 87% (mean = 61%) and  
252 regional forest composition ranged from 1% to 50% (mean = 21%). *Sitta pygmaea* landscapes

were also characterized by a combination of forest and shrubland cover types with forest  
254 composition ranging from 2% to 96% (mean = 50%) and regional forest composition from 0% to  
65% (mean = 14%).

256

#### *Genetic diversity and forest fragmentation*

258 Normal-probability plots and histograms showed that normality for regression-model residuals  
was met. For *P. gambeli*, sample size ranged from 4-19 individuals and the outlier test was  
260 significant ( $U = 0.40$ ,  $P = 0.003$ ). As such, we iteratively removed populations with fewer than 5  
and greater than 14 individuals sampled. Re-running the outlier test demonstrated that no more  
262 outliers were detected. The uncorrelated set of metrics included AREA\_CV and CLUMPY that  
resulted in eight separate models. For haplotype diversity, we found that two out of four models  
264 had support ( $\Delta AIC_c < 2$ ; Table 3). The model with the strongest support ( $w_i = 0.46$ ) included the  
forest cover only model, while the second best model ( $w_i = 0.18$ ) included only CLUMPY. For  
266 *P. gambeli*, haplotype diversity was slightly lower in landscapes with higher forest cover at  
landscape (Forest;  $\beta = -0.13 \pm 0.22$ ) and regional scales (FOR;  $\beta = -0.03 \pm 0.23$ ), but these  
268 relationships were highly variable. When forest aggregation (CLUMPY) was included in the  
model (Model 1; Table 3), we found that haplotype diversity for *P. gambeli* was higher in  
270 landscapes with a higher degree of forest aggregation (CLUMPY;  $\beta = 0.06 \pm 0.05$ ; Fig. 2A). The  
Nagelkerke  $R^2$  for the global model was 0.41. For nucleotide diversity, we found that one model  
272 had the strongest support ( $w_i = 0.60$ ). Similar to haplotype diversity, we found that nucleotide  
diversity was higher in landscapes of higher forest aggregation (CLUMPY;  $\beta = 0.79 \times 10^{-3} \pm$   
274  $0.29 \times 10^{-3}$ ; Fig. 2B).

For *S. carolinensis*, sample size ranged from 5-11 individuals, no outliers were detected  
276 ( $U = 0.70$ ,  $P = 1$ ), and the least correlated set of fragmentation metrics for *S. carolinensis* were  
AREA\_CV, SIMI, and CLUMPY. Combinations of these variables resulted in eight separate  
278 models. For haplotype diversity, we found that two models had the highest support in model  
selection ( $w_i = 0.86$ ). The top model ( $w_i = 0.57$ ) only included forest patch size variability as a  
280 fragmentation metric (AREA\_CV; Table 3). We found that *S. carolinensis* populations  
inhabiting more fragmented landscapes with a higher variability of forest patch sizes (high  
282 AREA\_CV) had lower haplotype diversity ( $\beta = -0.12 \pm 0.03$ ; Fig. 3). Haplotype diversity was  
also slightly higher in more forested landscapes at regional scales ( $\beta = 0.09 \pm 0.23$ ), although this  
284 was highly variable. The second most supported model ( $w_i = 0.29$ ), included sample size ( $n$ ) and  
showed a slightly positive relationship with haplotype diversity ( $\beta = 0.03 \pm 0.01$ ). The  
286 Nagelkerke  $R^2$  for the global model was 0.78. When analyzing nucleotide diversity the model  
including only forest cover had the most support ( $w_i = 0.78$ ; Table 3) suggesting that none of the  
288 fragmentation metrics provided sufficient explanatory power in describing the variation in  
nucleotide diversity for *S. carolinensis*. In these models, nucleotide diversity was higher in more  
290 forested landscapes at a local scale, but slightly lower in forested regions.

*Sitta pygmaea* populations ranged from 4-11 individuals sampled and the outlier test was  
292 not significant ( $U = 0.82$ ,  $P = 1$ ). We included three uncorrelated fragmentation metrics  
including AREA\_CV, ENN\_CV, and CLUMPY in model selection. Three out of six models had  
294 support ( $\Delta AIC_c < 2$ ), and the final model set included the model with forest cover only (Table  
3). In contrast to *P. gambeli* and *S. carolinensis*, we found that the haplotype diversity of *S.*  
296 *pygmaea* populations generally increased in more fragmented landscapes (Nagelkerke  $R^2 =$   
0.47). Haplotype diversity was lower in landscapes with higher forest aggregation (CLUMPY;  $\beta$

298 =  $-0.09 \pm 0.04$ ; Fig. 4) and higher in landscapes with more forest patch size variability  
(AREA\_CV;  $\beta = 0.10 \pm 0.04$ ). Nucleotide diversity showed the same general patterns including  
300 the forest cover only with highest support, given the data ( $w_i = 0.44$ ), and lower nucleotide  
diversity in landscape characterized by higher forest aggregation (CLUMPY;  $\beta = -0.31 \times 10^{-2} \pm$   
302  $0.02 \times 10^{-2}$ ).

#### 304 *Spatial autocorrelation*

We did not find any evidence of systematic patterns of spatial autocorrelation in the model  
306 residuals for any species (Fig. 5). After inspecting the spatial correlograms, we concluded that  
once the models incorporated the effects of forest configuration and composition, there were no  
308 broader spatial patterns in unexplained variation of within-population genetic diversity  
associated with geographic proximity.

310

## DISCUSSION

312 We used existing genetic data on three forest breeding bird species to examine the relationship  
between within-population genetic diversity and forest fragmentation across multiple  
314 independent landscapes. We predicted that patterns of within-population genetic diversity with  
fragmentation would vary among species as a consequence of differences in their degree of  
316 habitat specialization or dispersal abilities. However, these patterns did not vary with life history  
traits in the directions that we predicted. Specifically, we predicted that within-population  
318 genetic diversity would be more likely to decline in response to habitat fragmentation among  
habitat specialists and among weak dispersers (Bailey et al. 2007) because they would be less  
320 likely to disperse through the intervening matrix between appropriate habitat fragments (and,

therefore, would be more genetically isolated) than species with relatively broad habitat  
322 associations and stronger dispersal abilities. For two of the three species (*P. gambeli* and *S.*  
*carolinensis*), we found evidence that higher within-population genetic diversity was associated  
324 with landscapes characterized by lower levels of forest fragmentation. We found forest  
aggregation (CLUMPY) and the variability in forest patch area (AREA\_CV) to be the two  
326 strongest landscape predictors of genetic diversity in these two species. These metrics captured  
the characteristics of habitat fragmentation, where large, compact clusters of forest with low  
328 variability in size supported populations with higher levels of within-population genetic  
diversity.

330 Our findings for *P. gambeli* and *S. carolinensis* are consistent with the predominant  
conclusion of a survey of studies comparing within-population genetic diversity between  
332 fragmented and control landscapes: in 26 of 45 comparisons (~58%), studies found reduced  
genetic differentiation associated with fragmentation (Keyghobadi 2007). However, nearly half  
334 of these studies ( $n = 19$ ) found no effect or even an effect in the opposite direction (Keyghobadi  
2007). Likewise, in this study, we found patterns of higher within-population genetic diversity of  
336 *S. pygmaea* in fragmented landscapes. In our study, genetic diversity was higher in fragmented  
landscapes for the species that was the most specialized (Kingery and Ghalambor 2001,  
338 Spellman and Klicka 2006) and the most sedentary (Kingery and Ghalambor 2001), *S. pygmaea*.  
In contrast, *P. gambeli* and *S. carolinensis* have arguably broader habitat associations and  
340 stronger dispersal abilities than *S. pygmaea* (McCallum et al. 1999, Grubb and Pravosudov  
2008), yet both showed a reduction of genetic diversity with fragmentation. Information about  
342 dispersal distances for these species (and for songbirds in general) is limited, and is likely to be  
greater than the distances reported in the literature (Tittler et al. 2009). Nevertheless, the patterns

344 that we observed did not match our predictions based on their putative dispersal distances  
relative to one another, or with their relative specificity of habitat associations.

346 The elevated genetic diversity of *S. pygmaea* in fragmented landscapes is further  
surprising because of their cooperatively breeding social system. Many breeding pairs have one  
348 or more male helpers, usually offspring from previous broods (Kingery and Ghalambor 2001).  
Some juveniles merge with neighbors from the previous winter's group (Guntert et al. 1988,  
350 Sydeman et al. 1988). The short dispersal distances, natal philopatry, and habitat specificity of *S.*  
*pygmaea* are typical of many cooperatively breeding species (Woxvold et al. 2006, Haas et al.  
352 2010). Such characteristics likely contribute to geographic isolation and genetic structuring  
among populations, and could increase the vulnerability of cooperative breeders to habitat loss  
354 and fragmentation (Koenig et al. 1996, Walters et al. 2004, Haas et al. 2010). However,  
cooperative breeders could be buffered from loss of genetic diversity in large fragments, from  
356 which juveniles might not have to disperse to find a breeding vacancy (Walters et al. 2004).  
More research is needed regarding how cooperative breeding could influence the relationship  
358 between fragmentation and genetic diversity.

Studying the relationship between habitat and within-population genetic diversity using  
360 contemporary landscape data can be problematic because variation quantified by molecular  
markers such as mitochondrial DNA may reflect historic, rather than contemporary, patterns of  
362 environmental variation (Frankham et al. 2010, Landguth et al. 2010, Sork and Waits 2010). As  
an example, *S. pygmaea* exhibited a positive correlation between genetic diversity and increased  
364 fragmentation and is the only species in the study with a single glacial refuge but a similarly  
large contemporary distribution (Spellman and Klicka 2006). By contrast, *P. gambeli* and *S.*  
366 *carolinensis* had lower diversity in fragmented landscapes and are phylogeographically



structured into two or more reciprocally monophyletic clades and expanded to occupy their  
368 current distribution from two (or more) glacial refugia (Spellman and Klicka 2007, Spellman et  
al. 2007). Given the difference of range expansion from a single versus multiple glacial refugia,  
370 it is possible that the overall effective population size of *S. pygmaea* following expansion was  
larger and the contemporary distribution was achieved later than in *P. gambeli* or *S. carolinensis*.  
372 If this were true, then we would expect *S. pygmaea* to enter genetic drift equilibrium slower than  
other species with smaller, more disjunct postglacial population size. Thus, *S. pygmaea* may not  
374 have yet achieved this equilibrium, even though they have the lowest dispersal rates of the three  
examined species.

376 In some studies, when both historic and contemporary land use data have been studied,  
information about historic landscapes has proven to be a better predictor of current genetic  
378 variation than contemporary habitat fragmentation (Keyghobadi et al. 2005a, 2005b, Holzhauer  
et al. 2006). Mitochondrial markers generally reflect the genetic imprint of historical processes  
380 occurring hundreds of years before present (Frankham et al. 2010), but the samples used in this  
study were collected from natural areas less affected by modern day anthropogenic disturbance.  
382 Hence, it is likely that the contemporary patterns and variability of fragmentation across the  
study landscapes were sustained primarily by biophysical processes (e.g. soil type, topography,  
384 moisture gradients) rather than caused by human activity (e.g., human development). That being  
said, additional studies utilizing molecular markers (e.g., microsatellites) that may more readily  
386 capture contemporary genetic patterns could provide further insight into the relationships  
between patterns of landscape fragmentation and within-population genetic diversity we found.

388 Habitat fragmentation is a major driver of environmental change affecting avian  
populations across multiple levels of diversity (Fahrig 2003). In recent years, landscape genetics

390 has focused on quantifying the effects of fragmentation and landscape connectivity on the  
genetic structure among populations (Luque et al. 2012), but studies must continue to take a  
392 landscape-scaled approach of quantifying how characteristics of habitat configuration are  
correlated with within-population genetic variation among a wide range of landscapes. Using  
394 genetic data from multiple populations across a broad geographic area, we found within-  
population genetic diversity was generally higher in landscapes characterized by less fragmented  
396 forest habitat for two out of three forest breeding birds. These findings support the prediction that  
fragmented landscapes sustain genetically less diverse populations; however, we found the  
398 opposite pattern for the species that would normally be considered most susceptible to  
fragmentation effects due to its limited dispersal abilities and habitat specificity. For broader  
400 generalization based on empirical data, studies on genetic diversity and multiple species of  
varying life-history traits inhabiting multiple landscapes are needed.

402

#### ACKNOWLEDGMENTS

404 We thank the Carling/Benkman (University of Wyoming) and Dickinson/Dhondt (Cornell Lab of  
Ornithology) lab groups for constructive suggestions on an earlier version of this manuscript.

406

## LITERATURE CITED

- 408 Anderson, C. D., B. K. Epperson, M. J. Fortin, R. Holderegger, P. M. A. James, et al. 2010.  
Considering spatial and temporal scale in landscape-genetic studies of gene flow. *Molecular*  
410 *Ecology* 19:3565-3575.
- Avise, J. C. 2000. *Phylogeography: the history and formation of species*. Cambridge: Harvard  
412 University Press. 447 p.
- Barton, K. 2010. MuMIn: Multi-model inference. R package version 0.13.9. [http://CRAN.R-](http://CRAN.R-project.org/package=MuMIn)  
414 [project.org/package=MuMIn](http://CRAN.R-project.org/package=MuMIn).
- Bélisle, M., A. Desrochers, and M. J. Fortin. 2001. Influence of forest cover on the movements  
416 of forest birds: a homing experiment. *Ecology* 82:1893-1904.
- Boulinier, T., J. D. Nichols, J. E. Hines, J. R. Sauer, C. H. Flather, et al. 1998. Higher temporal  
418 variability of forest breeding bird communities in fragmented landscapes. *Proceedings of the*  
*National Academy of Sciences of the United States of America* 95:7497-7501.
- 420 Boulinier, T., J. D. Nichols, J. E. Hines, J. R. Sauer, C. H. Flather, et al. 2001. Forest  
fragmentation and bird community dynamics: Inference at regional scales. *Ecology* 82:1159-  
422 1169.
- Bowie, R. C. K. 2011. The utility of contemporary and historical estimates of dispersal in  
424 determining response to habitat fragmentation in a tropical forest-dependent bird community.  
*Molecular Ecology* 20:1799-1802.
- 426 Brawn, J. D., and R. P. Balda. 1988. Population biology of cavity nesters in northern Arizona:  
Do nest sites limit breeding densities? *Condor* 90:61-71.

- 428 Bruggeman, D. J., T. Wiegand, and N. Fernandez. 2010. The relative effects of habitat loss and  
fragmentation on population genetic variation in the red-cockaded woodpecker (*Picoides*  
430 *borealis*). *Molecular Ecology* 19:3679-3691.
- Burnham, K. P., and D. R. Anderson. 2002. Model selection and inference: a practical  
432 information-theoretic approach. New York: Springer-Verlag.
- Callens, T., P. Galbusera, E. Matthysen, E. Y. Durand, M. Githiru, et al. 2011. Genetic signature  
434 of population fragmentation varies with mobility in seven bird species of a fragmented Kenyan  
cloud forest. *Molecular Ecology* 20:1829-1844.
- 436 Chalfoun, A. D., F. R. Thompson, and M. J. Ratnaswamy. 2002. Nest predators and  
fragmentation: a review and meta-analysis. *Conservation Biology* 16:306-318.
- 438 Cushman, S. A., K. McGargal, and M. C. Neel. 2008. Parsimony in landscape metrics: Strength,  
universality, and consistency. *Ecological Indicators* 8:691-703.
- 440 Debinski, D. M., and R. D. Holt. 2000. A survey and overview of habitat fragmentation  
experiments. *Conservation Biology* 14:342-355.
- 442 Donovan, T. M., and C. H. Flather. 2002. Relationships among north American songbird trends,  
habitat fragmentation, and landscape occupancy. *Ecological Applications* 12:364-374.
- 444 Dormann, C. F., J. M. McPherson, M. B. Araujo, R. Bivand, J. Bolliger, et al. 2007. Methods to  
account for spatial autocorrelation in the analysis of species distributional data: A review.  
446 *Ecography* 30:609-628.
- Excoffier L., G. Laval, and S. Schneider. 2005. Arlequin (version 3.0): An integrated software  
448 package for population genetics data analysis. *Evolutionary Bioinformatics* 1:47-50.
- Fahrig, L. 2003. Effects of habitat fragmentation on biodiversity. *Annual Review of Ecology*  
450 *Evolution and Systematics* 34:487-515.

- Faraway, J. J. 2006. Extending the linear model with R: Generalized linear, mixed effects and  
452 nonparametric regression models. Boca Raton: Chapman & Hall/CRC. 301 p.
- Frankham, R., J. D. Ballou, and D. A. Briscoe. 2010. Introduction to conservation genetics.  
454 Cambridge: Cambridge University Press. 618 p.
- Grubb, T. C., and V. V. Pravosudov. 2008. White-breasted Nuthatch (*Sitta carolinensis*). In A.  
456 Poole [ed.], The Birds of North America Online: <http://bnabirds.cornelledu/bna/species/054>  
Accessed 13 February 2013.
- 458 Grubbs, F. E. 1950. Sample criteria for testing outlying observations. *Annals of Mathematical  
Statistics* 21:27-58.
- 460 Güntert, M., D. B. Hay, and R. P. Balda. 1988. Communal roosting in pygmy nuthatches: A  
winter survival strategy. *Proceedings of the 19th International Ornithological Congress* 19:1964-  
462 1972.
- Haas, S. E., J. A. Cox, J. V. Smith, and R. T. Kimball. 2010. Fine-scale spatial genetic structure  
464 in the cooperatively breeding Brown-headed Nuthatch (*Sitta pusilla*). *Southeastern Naturalist*  
9:743-756.
- 466 Hartl, D. L., and A. G. Clark. 2007. Principles of population genetics. Sunderland: Sinauer  
Associates. 652 p.
- 468 Holzhauer, S. I. J., K. Ekschmitt, A. C. Sander, J. Dauber, and V. Wolters. 2006. Effect of  
historic landscape change on the genetic structure of the bush-cricket *Metrioptera roeseli*.  
470 *Landscape Ecology* 21:891-899.
- Homer, C., J. Dewitz, J. Fry, M. Coan, N. Hossain, et al. 2007. Completion of the 2001 National  
472 Land Cover Database for the conterminous United States. *Photogrammetric Engineering and  
Remote Sensing* 73:337-341.

- 474 Jaarola, M., H. Tegelstrom, and K. Fredga. 1999. Colonization history in Fennoscandian rodents.  
Biological Journal of the Linnean Society 68:113-127.
- 476 Jenkins, D. G., M. Carey, J. Czerniewska, J. Fletcher, T. Hether, et al. (2010). A meta-analysis of  
isolation by distance: relic or reference standard for landscape genetics? *Ecography* 33:315-320.
- 478 Johansson, M., C. R. Primmer, J. Sahlsten, and J. Merila. 2005. The influence of landscape  
structure on occurrence, abundance and genetic diversity of the common frog, *Rana temporaria*.  
480 *Global Change Biology* 11:1664-1679.
- Keyghobadi, N. 2007. The genetic implications of habitat fragmentation. *Canadian Journal of*  
482 *Zoology* 85:1049-1064.
- Keyghobadi, N., J. Roland, S. F. Matter, and C. Strobeck. 2005. Among- and within-patch  
484 components of genetic diversity respond at different rates to habitat fragmentation: An empirical  
demonstration. *Proceedings of the Royal Society B-Biological Sciences* 272:553-560.
- 486 Keyghobadi, N., J. Roland, and C. Strobeck. 2005. Genetic differentiation and gene flow among  
populations of the alpine butterfly, *Parnassius smintheus*, vary with landscape connectivity.  
488 *Molecular Ecology* 14:1897-1909.
- Kingery, H. E., and C. K. Ghalambor. 2001. Pygmy Nuthatch (*Sitta pygmaea*). In A. Poole [ed.],  
490 *The Birds of North America Online*: <http://bnabirds.cornell.edu/bna/species/567> Accessed 13  
February 2013.
- 492 Koenig, W. D., D. VanVuren, and P. N. Hooge. 1996. Detectability, philopatry, and the  
distribution of dispersal distances in vertebrates. *Trends in Ecology and Evolution* 11:514-517.
- 494 Landguth, E. L., S. A. Cushman, M. K. Schwartz, K. S. McKelvey, M. Murphy, et al. (2010).  
Quantifying the lag time to detect barriers in landscape genetics. *Molecular Ecology* 19:4179-  
496 4191.

- Luque, S., S. Saura, and M. J. Fortin. 2012. Landscape connectivity analysis for conservation:  
498 Insights from combining new methods with ecological and genetic data. *Landscape Ecology*  
27:153-157.
- 500 Matthysen, E., and K. H. Schmidt. 1987. Natal dispersal in the Nuthatch. *Ornis Scandinavica*  
18:313-316.
- 502 McCallum, D. A., R. Grundel, and D. L. Dahlsten. 1999. Mountain Chickadee (*Poecile gambeli*).  
*In* A. Poole [ed.], *The Birds of North America Online*: <http://bnabirds.cornelledu/bna/species/453>  
504 Accessed 13 February 2013.
- McGarigal, K., and S. A. Cushman. 2002. Comparative evaluation of experimental approaches to  
506 the study of habitat fragmentation effects. *Ecological Applications* 12:335-345.
- McGarigal, K., S. A. Cushman, M. C. Neel, and E. Ene. 2002. FRAGSTATS: Spatial Pattern  
508 Analysis Program for Categorical Maps. Computer software program produced by the authors at  
the University of Massachusetts, Amherst. Available at the following web site:  
510 [www.umass.edu/landeco/research/fragstats/fragstats.html](http://www.umass.edu/landeco/research/fragstats/fragstats.html).
- Mech, S. G., and J. G. Hallett. 2001. Evaluating the effectiveness of corridors: a genetic  
512 approach. *Conservation Biology* 15:467-474.
- Møller, A. P., L. Z. Garamszegi, and C. N. Spottiswoode. 2008. Genetic similarity, breeding  
514 distribution range and sexual selection. *Journal of Evolutionary Biology* 21:213-225.
- Nagelkerke, N. J. D. 1991. A note on a general definition of the coefficient of determination.  
516 *Biometrika* 78:691-692.
- Norris, R. A. 1958. Comparative biosystematics and life history of the nuthatches *Sitta pygmaea*  
518 and *Sitta pusilla*. *University of California Publications in Zoology* 56:119-300.

- R Development Core Team. 2009. R: A language and environment for statistical computing.  
520 Vienna: R Foundation for Statistical Computing.
- Sork, V. L., and L. Waits. 2010. Contributions of landscape genetics – approaches, insights, and  
522 future potential. *Molecular Ecology* 19:3489-3495.
- Spellman, G. M., and J. Klicka. 2007. Phylogeography of the white-breasted nuthatch (*Sitta*  
524 *carolinensis*): diversification in North American pine and oak woodlands. *Molecular Ecology*  
16:1729-1740.
- 526 Spellman, G. M., B. Riddle, and J. Klicka. 2007. Phylogeography of the mountain chickadee  
(*Poecile gambeli*): diversification, introgression, and expansion in response to Quaternary  
528 climate change. *Molecular Ecology* 16:1055-1068.
- Spellman, G. M., and J. Klicka. 2006. Testing hypotheses of Pleistocene population history using  
530 coalescent simulations: phylogeography of the Pygmy Nuthatch (*Sitta pygmaea*). *Proceedings of*  
*the Royal Society B-Biological Sciences* 273:3057-3063.
- 532 Storfer, A., M. A. Murphy, S. F. Spear, R. Holderegger, and L. P. Waits. 2010. Landscape  
genetics: Where are we now? *Molecular Ecology* 19:3496-3514.
- 534 Sydeman, W. J., M. Güntert, and R. P. Balda. 1988. Annual reproductive yield in the cooperative  
Pygmy Nuthatch (*Sitta pygmaea*). *Auk* 105:70-77.
- 536 Templeton, A. R., K. Shaw, E. Routman, and S. K. Davis. 1990. The genetic consequences of  
habitat fragmentation. *Annals of the Missouri Botanical Garden* 77:13-27.
- 538 Thomassen, H. A., Z. A. Cheviron, A. H. Freedman, R. J. Harrigan, R. K. Wayne, et al. 2010.  
Spatial modelling and landscape-level approaches for visualizing intra-specific variation.  
540 *Molecular Ecology* 19:3532-3548.



- Tittler, R., M. A. Villard, and L. Fahrig. 2009. How far do songbirds disperse? *Ecography* 32:1051-1061.
- Turner, M. G., R. H. Gardner, and R. V. O'Neill. 2001. *Landscape ecology in theory and practice: Pattern and process*. New York: Springer. 401 p.
- Van Houtan, K. S., S. L. Pimm, J. M. Halley, R. O. Bierregaard, and T. E. Lovejoy. 2007. Dispersal of Amazonian birds in continuous and fragmented forest. *Ecology Letters* 10:219-229.
- Vandergast, A. G., A. J. Bohonak, D. B. Weissman, and R. N. Fisher. 2007. Understanding the genetic effects of recent habitat fragmentation in the context of evolutionary history: phylogeography and landscape genetics of a southern California endemic Jerusalem cricket (Orthoptera: Stenopelmatidae: *Stenopelmatus*). *Molecular Ecology* 16:977-992.
- Villard, M. A., M. K. Trzcinski, and G. Merriam. 1999. Fragmentation effects on forest birds: relative influence of woodland cover and configuration on landscape occupancy. *Conservation Biology* 13:774-783.
- Walters, J. R., C. B. Cooper, S. J. Daniels, G. Pasinelli, and K. Schiegg. 2004. Conservation biology. *In* W. D. Koenig and J. J. Dickinson [eds.], *Ecology and Evolution of Cooperative Breeding in Birds* Cambridge: Cambridge University Press. pp. 197-209.
- Wilcove, D. S. 1985. Nest predation in forest tracts and the decline of migratory songbirds. *Ecology* 66:1211-1214.
- Winkel, W. 1989. Distribution factors and age structure of the nuthatch (*Sitta eueopae caesia*). *Vogelwarte* 35:37-48.
- Woxvold, I. A., G. J. Adcock, and R. A. Mulder. 2006. Fine-scale genetic structure and dispersal in cooperatively breeding apostlebirds. *Molecular Ecology* 15:3139-3146.

Young, A., T. Boyle, and T. Brown. 1996. The population genetic consequences of habitat  
564 fragmentation for plants. *Trends in Ecology and Evolution* 11:413-418.

566 Figure Legends

FIGURE 1. Geographic locations of sampling points for *Poecile gambeli* (A.), *Sitta carolinensis*  
568 (B.), and *Sitta pygmaea* (C.) in western USA. Labels represent population identifiers (see Table  
1).

570

FIGURE 2. For *P. gambeli*, haplotype diversity (A.) and nucleotide diversity (B.) was higher in  
572 landscapes characterized by a higher degree of forest aggregation (CLUMPY).

574 FIGURE 3. For *S. carolinensis* populations, haplotype diversity was lower in more fragmented  
landscapes characterized by higher variation in forest patch size (AREA\_CV).

576

FIGURE 4. For *S. pygmaea*, haplotype diversity was lower in landscapes characterized by a  
578 higher degree of forest aggregation (CLUMPY).

580 FIGURE 5. Spatial correlograms of GLM model residuals for *P. gambeli* (circles), *S.*  
*carolinensis* (squares) and *S. pygmaea* (triangles) for haplotype (A.) and nucleotide (B.)  
582 diversity. Filled symbols indicate significant spatial autocorrelation ( $P < 0.05$ ) based on 10,000  
permutations within a given distance class.

584

A.

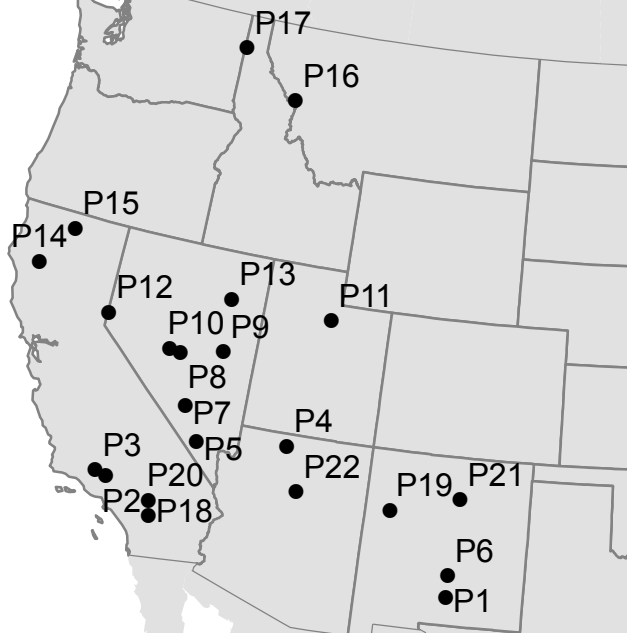

B.

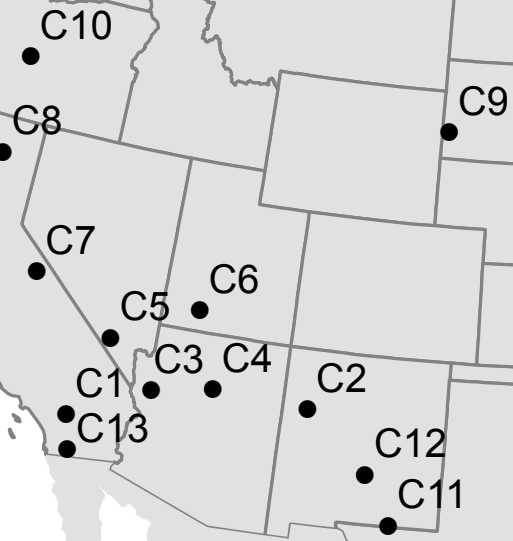

C.

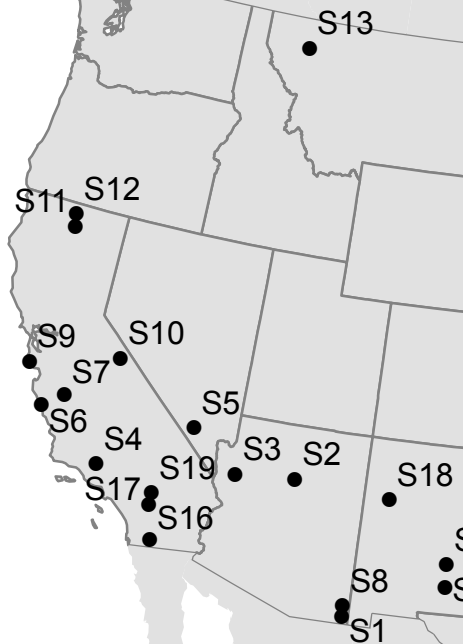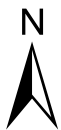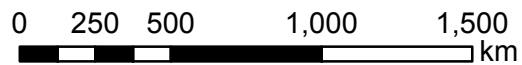

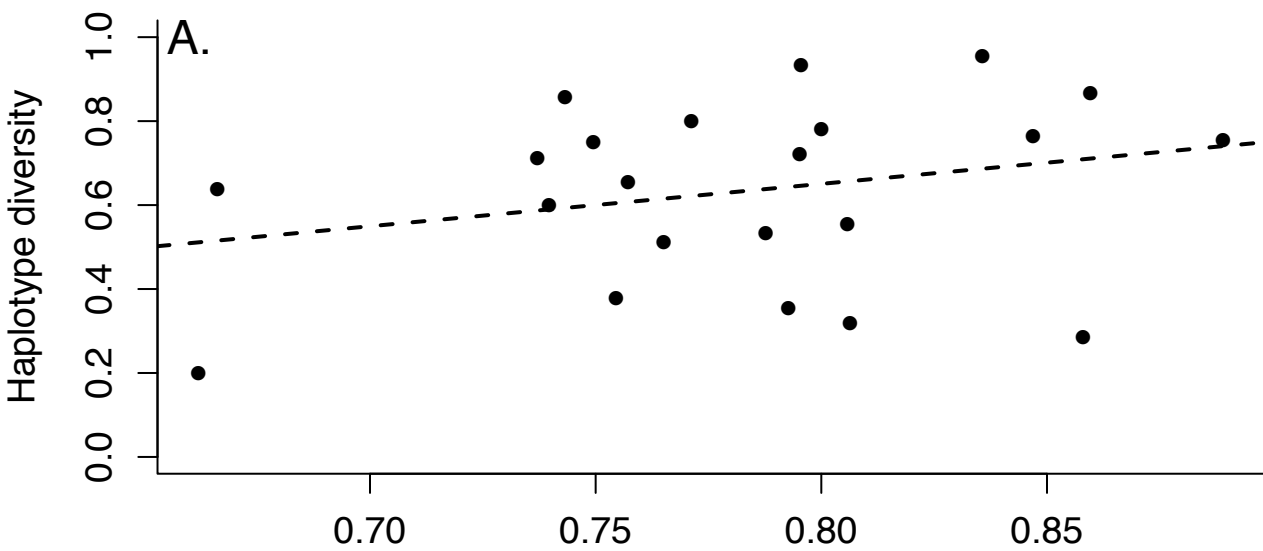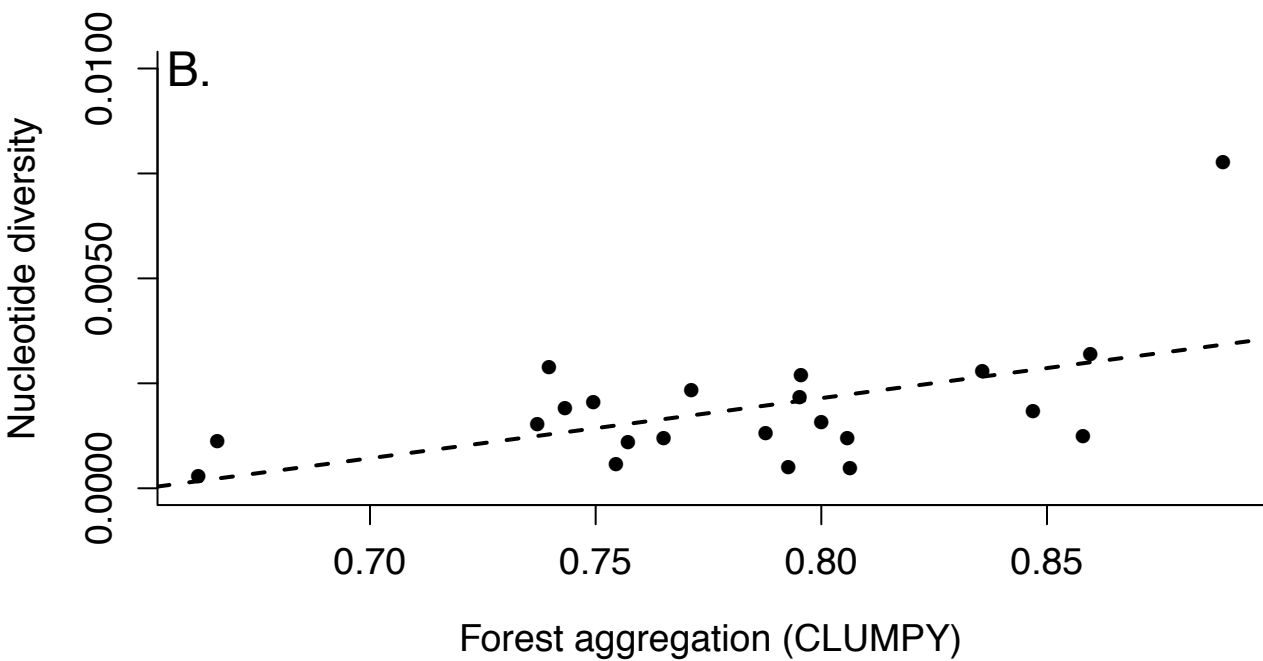

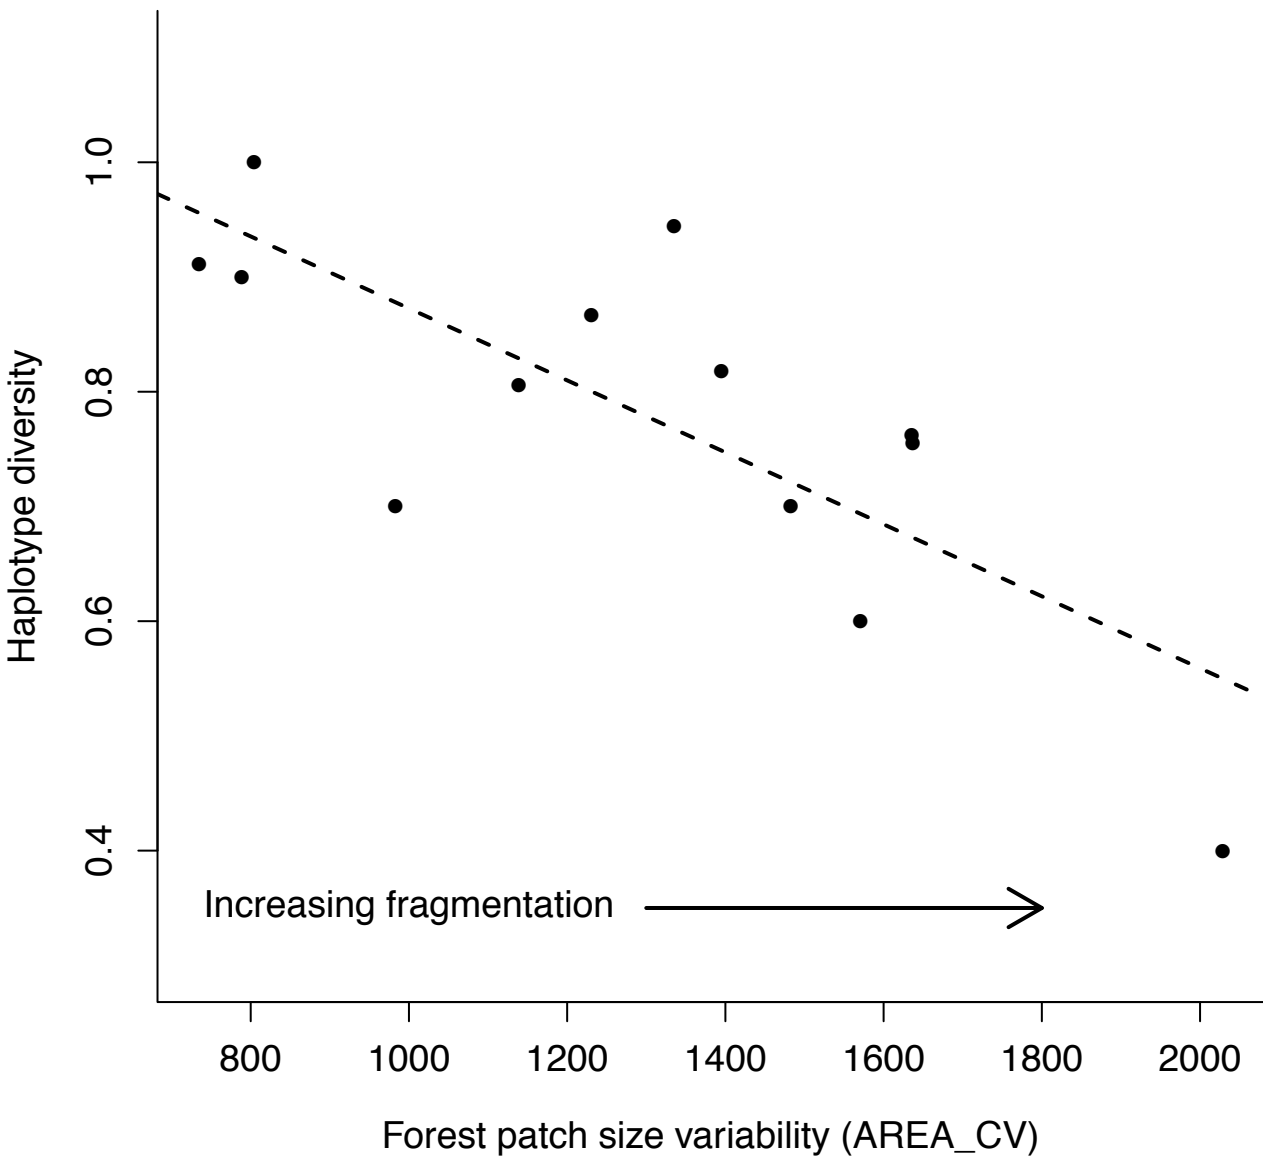

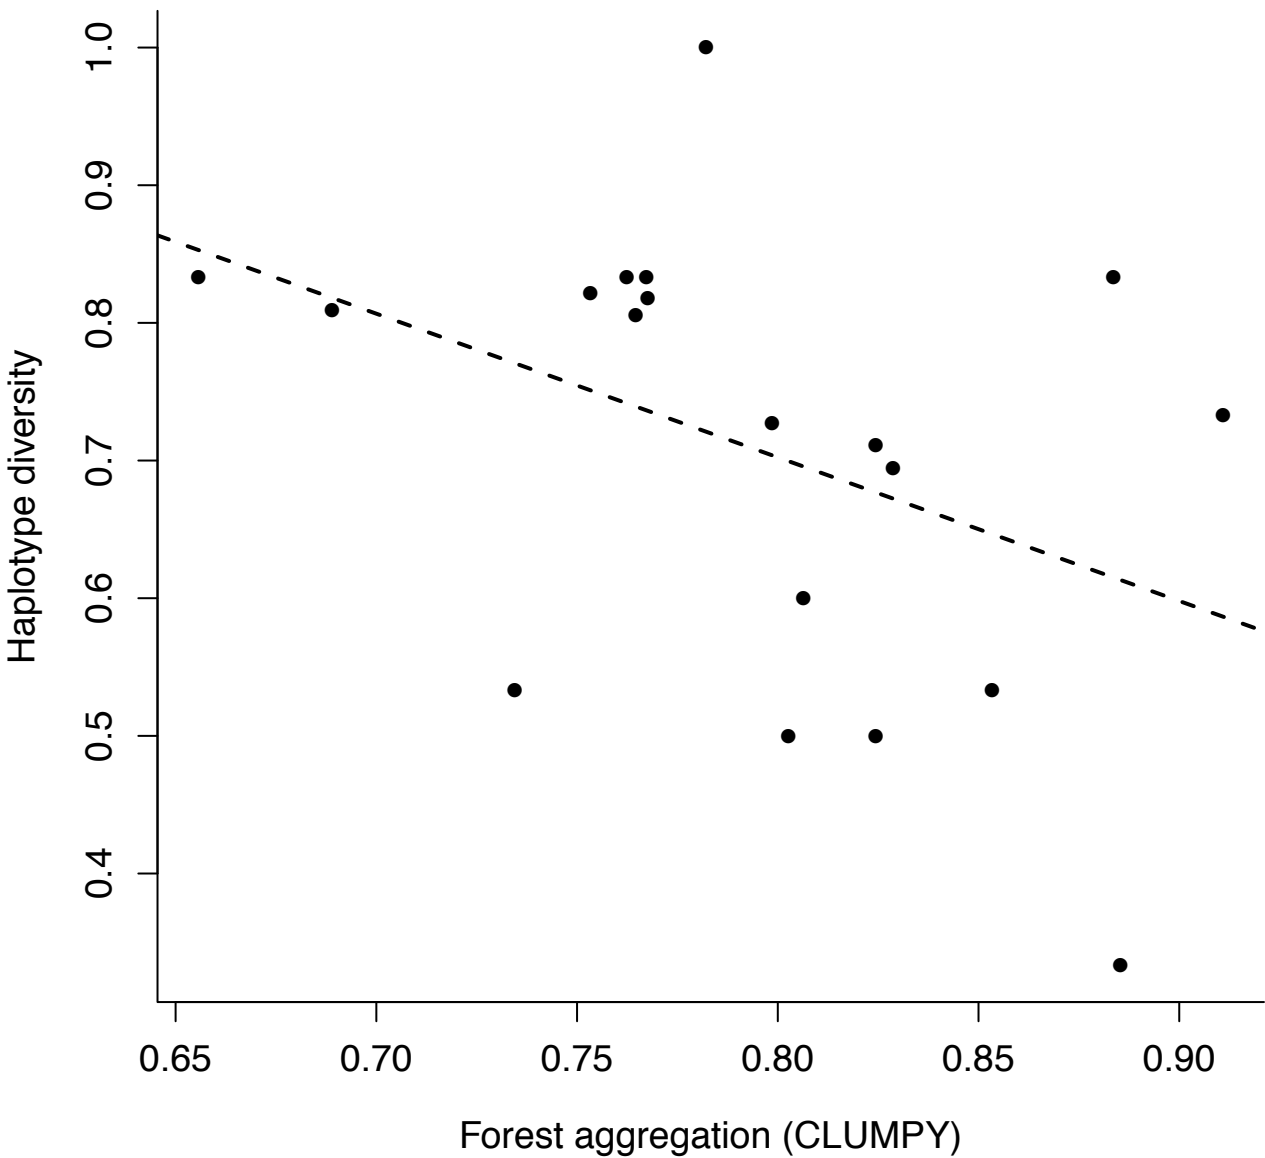

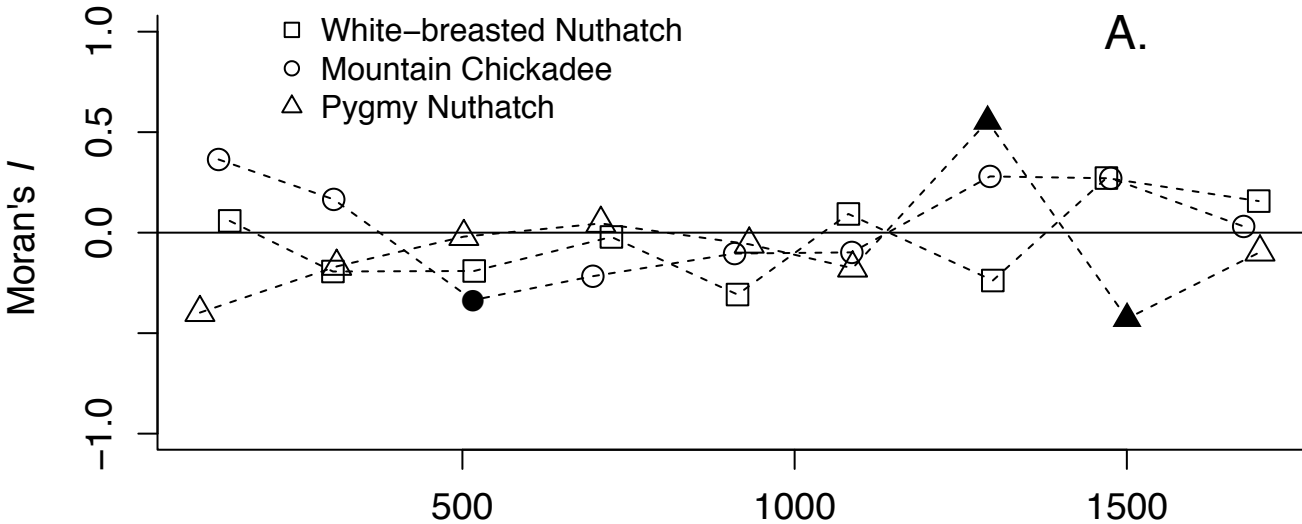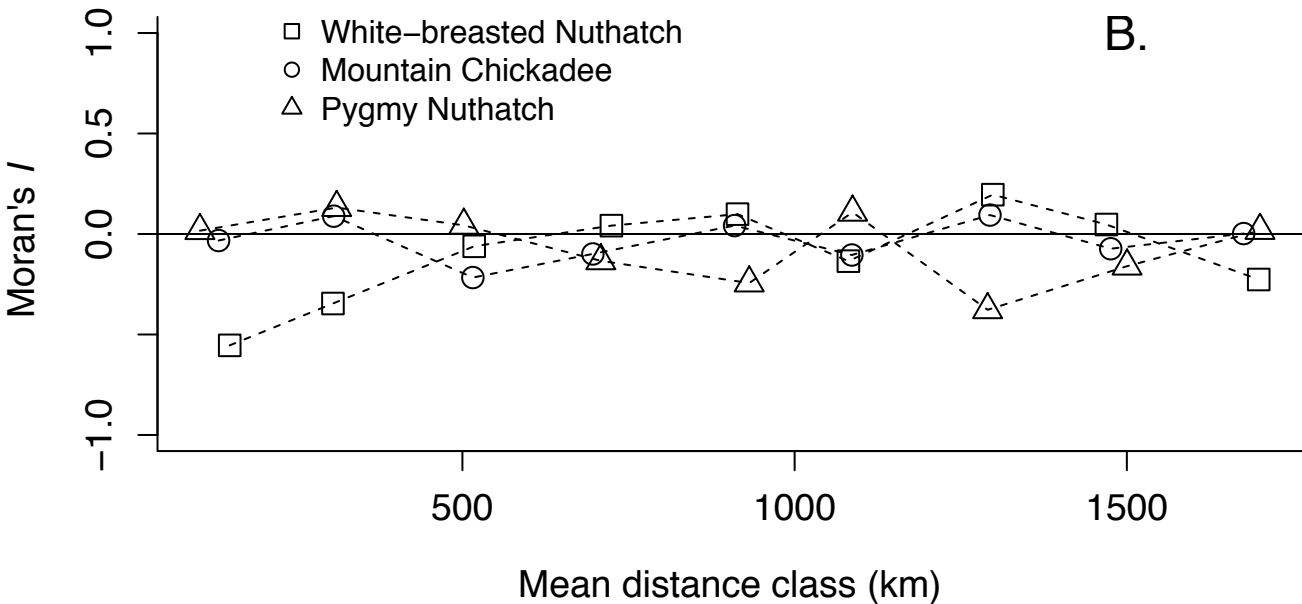



TABLE 1. Population identifier, number of individuals sampled ( $n$ ), haplotype number (number of unique haplotypes in each population), haplotype diversity and standard deviation, and pairwise nucleotide diversity and standard deviation (SD), derived from complete sequences of the mitochondrial gene NADH dehydrogenase subunit 2 (ND2), for each population from the three species used in this study.

| Pop                    | $n$ | Number of Haplotypes | Haplotype Diversity | Haplotype Diversity (SD) | Nucleotide Diversity | Nucleotide Diversity (SD) |
|------------------------|-----|----------------------|---------------------|--------------------------|----------------------|---------------------------|
| <i>P. gambeli</i>      |     |                      |                     |                          |                      |                           |
| P1                     | 8   | 4                    | 0.75                | 0.1391                   | 0.002058             | 0.001591                  |
| P2                     | 10  | 3                    | 0.60                | 0.1305                   | 0.002882             | 0.002002                  |
| P3                     | 10  | 4                    | 0.53                | 0.1801                   | 0.001313             | 0.001119                  |
| P4                     | 9   | 3                    | 0.64                | 0.1258                   | 0.001121             | 0.001017                  |
| P5                     | 10  | 5                    | 0.80                | 0.1001                   | 0.002337             | 0.001702                  |
| P6                     | 7   | 2                    | 0.29                | 0.1964                   | 0.001235             | 0.001126                  |
| P7                     | 10  | 8                    | 0.96                | 0.0594                   | 0.002786             | 0.001950                  |
| P8                     | 10  | 7                    | 0.87                | 0.1072                   | 0.003202             | 0.002177                  |
| P9                     | 10  | 5                    | 0.76                | 0.1295                   | 0.007781             | 0.004633                  |
| P10                    | 10  | 7                    | 0.93                | 0.0620                   | 0.002690             | 0.001897                  |
| P11                    | 10  | 2                    | 0.36                | 0.1591                   | 0.000512             | 0.000612                  |
| P12                    | 10  | 3                    | 0.51                | 0.1643                   | 0.001185             | 0.001043                  |
| P13                    | 10  | 3                    | 0.71                | 0.0860                   | 0.001537             | 0.001250                  |
| P14                    | 10  | 2                    | 0.20                | 0.1541                   | 0.000288             | 0.000439                  |
| P15                    | 10  | 3                    | 0.38                | 0.1813                   | 0.000576             | 0.000657                  |
| P16                    | 7   | 4                    | 0.86                | 0.1023                   | 0.001921             | 0.001544                  |
| P17                    | 11  | 5                    | 0.78                | 0.0926                   | 0.001572             | 0.001257                  |
| P18                    | 11  | 5                    | 0.76                | 0.1066                   | 0.001834             | 0.001405                  |
| P19                    | 12  | 3                    | 0.31                | 0.1637                   | 0.00048              | 0.000578                  |
| P20                    | 13  | 4                    | 0.65                | 0.1060                   | 0.001108             | 0.000972                  |
| P21                    | 9   | 3                    | 0.56                | 0.1653                   | 0.001201             | 0.001065                  |
| P22                    | 9   | 5                    | 0.72                | 0.1592                   | 0.002161             | 0.001624                  |
| <i>S. carolinensis</i> |     |                      |                     |                          |                      |                           |
| C1                     | 5   | 2                    | 0.60                | 0.1753                   | 0.001153             | 0.001020                  |
| C2                     | 5   | 3                    | 0.70                | 0.2184                   | 0.001537             | 0.001267                  |
| C3                     | 5   | 2                    | 0.40                | 0.2373                   | 0.001153             | 0.001020                  |
| C4                     | 11  | 7                    | 0.82                | 0.1191                   | 0.001537             | 0.001111                  |
| C5                     | 9   | 7                    | 0.94                | 0.0702                   | 0.004696             | 0.002865                  |
| C6                     | 5   | 5                    | 1.00                | 0.1265                   | 0.001921             | 0.001509                  |
| C7                     | 6   | 4                    | 0.87                | 0.1291                   | 0.001153             | 0.000980                  |
| C8                     | 7   | 3                    | 0.76                | 0.1148                   | 0.001006             | 0.000864                  |

|     |    |   |      |                   |          |          |
|-----|----|---|------|-------------------|----------|----------|
| C9  | 5  | 3 | 0.70 | 0.2184            | 0.005764 | 0.003866 |
| C10 | 5  | 4 | 0.90 | 0.1610            | 0.001921 | 0.001509 |
| C11 | 10 | 5 | 0.76 | 0.1295            | 0.000982 | 0.000808 |
| C12 | 9  | 5 | 0.81 | 0.1196            | 0.001067 | 0.000868 |
| C13 | 10 | 7 | 0.91 | 0.0773            | 0.002092 | 0.001428 |
|     |    |   |      | <i>S. pygmaea</i> |          |          |
| S1  | 4  | 3 | 0.83 | 0.2224            | 0.001921 | 0.001612 |
| S2  | 11 | 6 | 0.73 | 0.1444            | 0.001816 | 0.001264 |
| S3  | 4  | 2 | 0.50 | 0.2652            | 0.000480 | 0.000595 |
| S4  | 4  | 4 | 1.00 | 0.1768            | 0.003842 | 0.002888 |
| S5  | 9  | 4 | 0.69 | 0.1470            | 0.001548 | 0.001143 |
| S6  | 4  | 3 | 0.83 | 0.2224            | 0.004003 | 0.002993 |
| S7  | 6  | 2 | 0.53 | 0.1721            | 0.001537 | 0.001215 |
| S8  | 8  | 4 | 0.82 | 0.1007            | 0.001818 | 0.001316 |
| S9  | 6  | 3 | 0.73 | 0.1552            | 0.003202 | 0.002203 |
| S10 | 10 | 4 | 0.71 | 0.1175            | 0.002263 | 0.001521 |
| S11 | 4  | 3 | 0.83 | 0.2224            | 0.003202 | 0.002465 |
| S12 | 4  | 2 | 0.50 | 0.2652            | 0.001921 | 0.001612 |
| S13 | 4  | 3 | 0.83 | 0.2224            | 0.002081 | 0.001719 |
| S14 | 7  | 4 | 0.81 | 0.1298            | 0.002379 | 0.001668 |
| S15 | 6  | 2 | 0.33 | 0.2152            | 0.001281 | 0.001059 |
| S16 | 11 | 7 | 0.89 | 0.1191            | 0.002987 | 0.001892 |
| S17 | 10 | 4 | 0.53 | 0.1801            | 0.001153 | 0.000907 |
| S18 | 11 | 4 | 0.60 | 0.1539            | 0.001991 | 0.001359 |
| S19 | 9  | 5 | 0.81 | 0.1196            | 0.002295 | 0.001559 |

---

590

592

594

596

598

TABLE 2. Metrics used to quantify forest fragmentation within 10 km radius-landscapes. We include interpretations for only those metrics retained in the top models identified through model selection.

| Metric  | Description                                                        | Ecological Interpretation <sup>a</sup>                                                                |
|---------|--------------------------------------------------------------------|-------------------------------------------------------------------------------------------------------|
| Forest  | Percentage of landscape classified as forest in a 10-km landscape  | Degree that landscape is comprised of forest                                                          |
| FOR     | Percentage of landscape classified as forest in a 100-km landscape | Degree that surrounding region is comprised of forest                                                 |
| AREA_CV | Patch area coefficient of variation                                | Forest patch size variability, where increasing variability indicates greater fragmentation           |
| CLUMPY  | Clumpy index                                                       | Aggregation of forest patches, where positive index values indicate large, compact clusters of forest |

<sup>a</sup>Interpretation based on Cushman et al. (2008)

600

602

TABLE 3. Model selection results testing the relationship between fragmentation and genetic diversity for *P. gambeli*, *S. carolinensis* and *S. pygmaea*. We report Akaike's second-order information criterion ( $AIC_c$ ), Akaike weights ( $w_i$ ) and associated parameter estimates for the fragmentation metrics included in each model. Only models with strong support ( $\Delta AIC_c < 2$ ) are presented. Forest composition at the 10 km (Forest) and 100 km (FOR) landscape scales.

|                             | $AIC_c$ | $\Delta AIC_c$ | $w_i$ | n    | Forest                | FOR                    | AREA_CV | CLUMPY                 |
|-----------------------------|---------|----------------|-------|------|-----------------------|------------------------|---------|------------------------|
| <i>P. gambeli</i>           |         |                |       |      |                       |                        |         |                        |
| <i>Haplotype diversity</i>  |         |                |       |      |                       |                        |         |                        |
| Forest cover only           | 4.1     | 0.00           | 0.46  |      | -0.13                 | -0.03                  |         |                        |
| Model 1                     | 6.0     | 1.92           | 0.18  |      | -0.12                 | 0.01                   |         | 0.06                   |
| <i>Nucleotide Diversity</i> |         |                |       |      |                       |                        |         |                        |
| Model 1                     | -217.1  | 0.00           | 0.60  |      | $0.30 \times 10^{-3}$ | $-0.75 \times 10^{-3}$ |         | $-0.75 \times 10^{-3}$ |
| <i>S. carolinensis</i>      |         |                |       |      |                       |                        |         |                        |
| <i>Haplotype diversity</i>  |         |                |       |      |                       |                        |         |                        |
| Model 1                     | -4.9    | 0.00           | 0.57  |      | -0.02                 | 0.09                   | -0.12   |                        |
| Model 2                     | -3.6    | 1.35           | 0.29  | 0.03 | 0.00                  | 0.25                   | -0.11   |                        |
| <i>Nucleotide diversity</i> |         |                |       |      |                       |                        |         |                        |

|                             |        |      |      |                       |                        |      |                        |
|-----------------------------|--------|------|------|-----------------------|------------------------|------|------------------------|
| Forest cover only           | -121.5 | 0.00 | 0.78 | $0.23 \times 10^{-2}$ | $-0.26 \times 10^{-2}$ |      |                        |
| <i>S. pygmaea</i>           |        |      |      |                       |                        |      |                        |
| <i>Haplotype diversity</i>  |        |      |      |                       |                        |      |                        |
| Model 1                     | 3.8    | 0.00 | 0.25 | -0.16                 | 0.19                   |      | -0.09                  |
| Forest cover only           | 3.9    | 0.13 | 0.23 | -0.07                 | 0.13                   |      |                        |
| Model 2                     | 4.1    | 0.33 | 0.21 | -0.19                 | 0.30                   | 0.09 | -0.13                  |
| <i>Nucleotide diversity</i> |        |      |      |                       |                        |      |                        |
| Forest cover only           | -111.7 | 0.00 | 0.44 | $0.36 \times 10^{-2}$ | $0.74 \times 10^{-2}$  |      |                        |
| Model 1                     | -109.8 | 1.88 | 0.17 | $0.07 \times 10^{-2}$ | $0.96 \times 10^{-2}$  |      | $-0.31 \times 10^{-2}$ |

---
